# Supplementary material
Source: Royal Society of Chemistry journal article supplement (doi:10.1039/d6ay00167j)
Supplement: d6ay00167j1.pdf [file d6ay00167j1.pdf]

Supplementary data

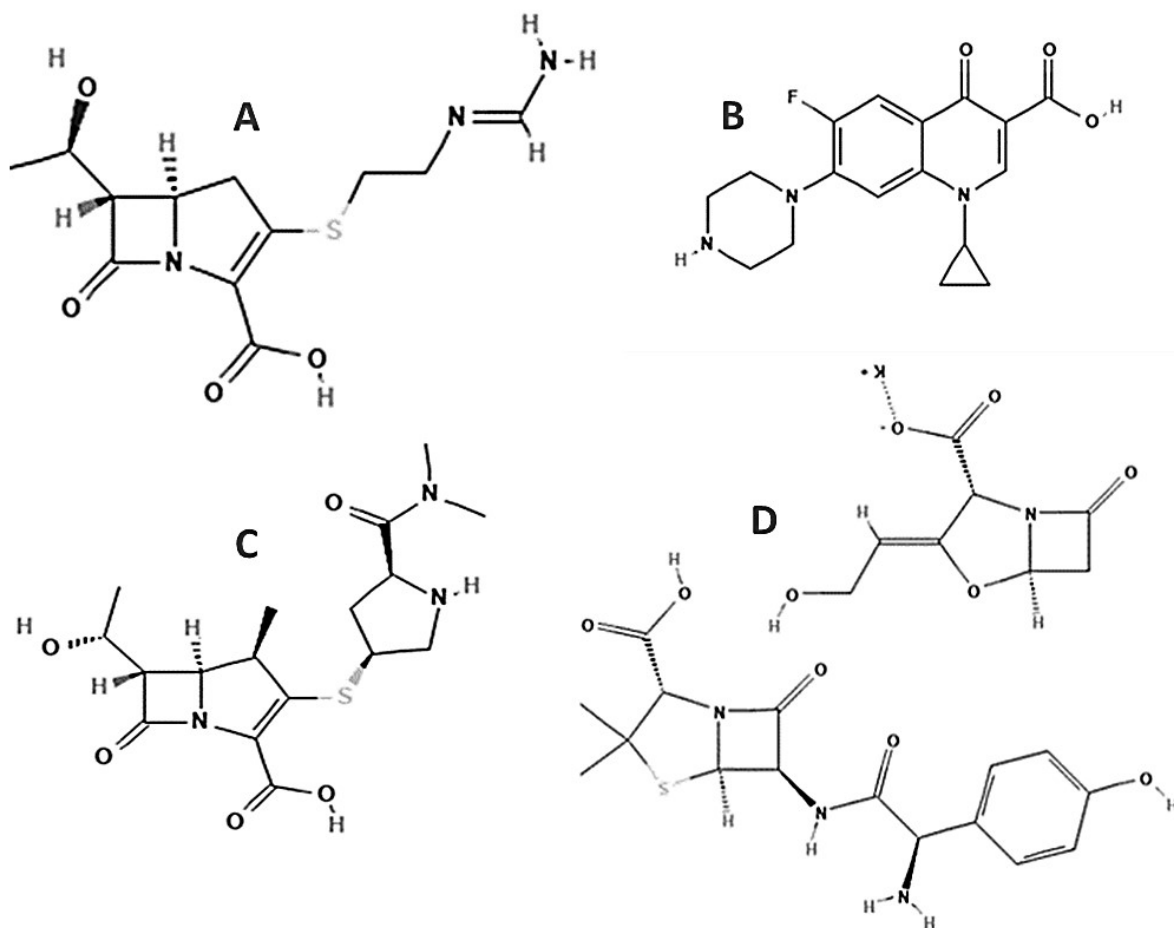

**Figure S1:** Chemical structures of the antibiotics used for the synthesis of AuNPs@ANT. (A) Imipenem, (B) Ciprofloxacin (C) Meropenem and (D) Augmentin (Amoxicillin-Clavulanate).

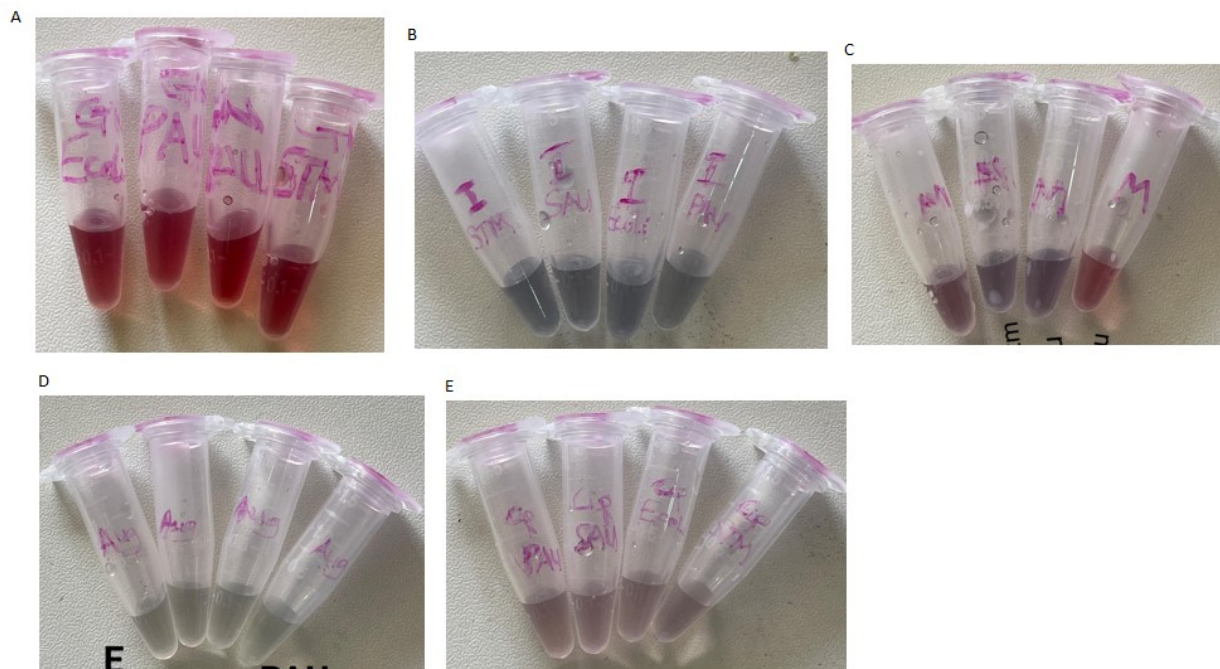

**Figure S2:** Colorimetric response of Screening of *Staphylococcus aureus*, *E. coli*, *Pseudomonas aeruginosa* and *Salmonella typhimurium* strains using antibiotic nanoconjugates when exposed to: (A) unmodified AuNPs (B) AuNPs@IMI, (D) AuNPs@MER, (E) AuNPs@AUG and (F) AuNPs@CIP,

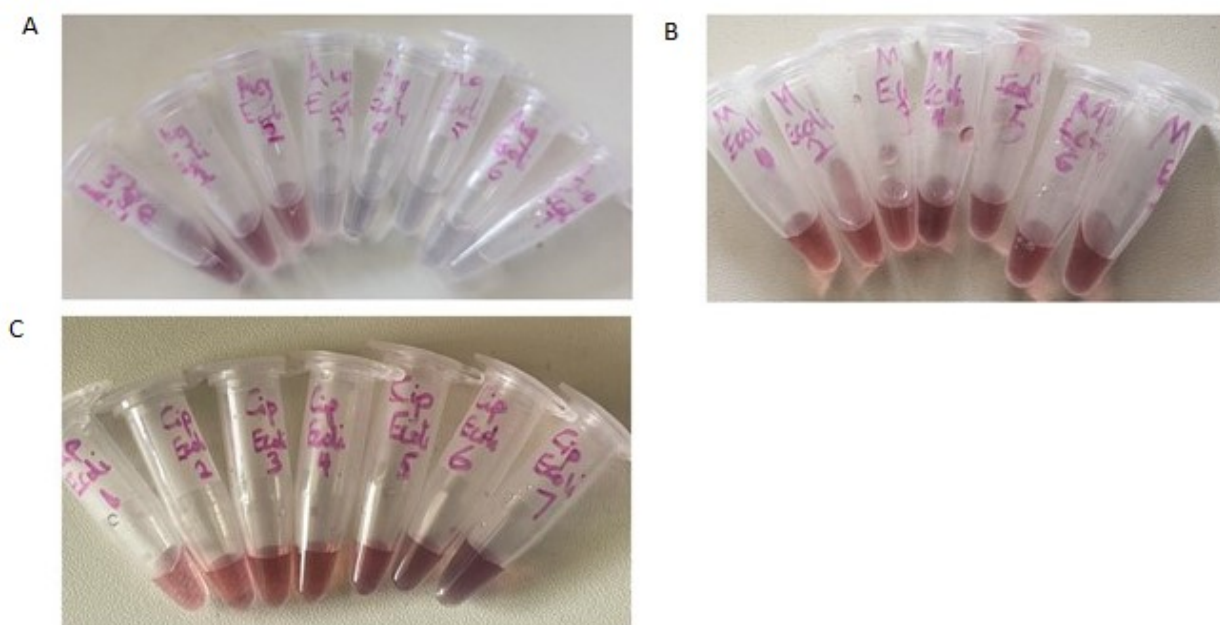

**Figure S3:** Color change for detection of *E. coli* using conjugates of antibiotics. (A) AuNPs@MER, (B) AuNPs@AUG and (c) AuNPs@CIP.
